# Supplementary material
Source: MDPI journal article supplement (https://www.mdpi.com/2073-4441/10/2/105)
Supplement: s1 [file s1]

## Sheet: Exp
Condition	Replicate	Day	TP ug per core	TN ug per core	N:P
LV	1	-30	42.1876	5377.19	127.459
LV	2	-30	35.8479	4204.38	117.284
LV	3	-30	34.5675	3646.5	105.489
LV	1	0	301.766	30982.7	102.671
LV	2	0	130.139	21606.5	166.027
LV	3	0	103.591	14747.7	142.365
LV	1	1	148.864	8581.57	57.6471
LV	2	1	99.7386	8453.4	84.7555
LV	3	1	43.7308	6166.78	141.017
LV	1	3	103.701	9491.93	91.5313
LV	2	3	103.5	8667.96	83.7488
LV	3	3	50.5112	6863.92	135.889
LV	1	5	76.218	9952.12	130.574
LV	2	5	73.6685	10622.8	144.197
LV	3	5	88.2954	8820.28	99.8951
LV	1	7	110.422	10545.9	95.5056
LV	2	7	108.107	11608	107.375
LV	3	7	59.6744	9640.63	161.554
LV	1	9	135.373	10158.6	75.0412
LV	2	9	119.703	12527.4	104.654
LV	3	9	59.6409	10927.8	183.226
LV	1	11	108.44	11840.2	109.186
LV	2	11	232.273	19909.1	85.7143
LV	3	11	66.8773	9658.81	144.426
LV	1	13	144.924	13152.1	90.752
LV	2	13	99.5826	11284.3	113.316
LV	3	13	131.443	16186.7	123.145
HV	1	-30	20.8917	4458.9	213.429
HV	2	-30	21.5433	4030.3	187.079
HV	3	-30	26.953	3288.69	122.016
HV	1	0	97.4814	11830.6	121.362
HV	2	0	190.478	33177.3	174.179
HV	3	0	251.481	32613.3	129.685
HV	1	1	96.4551	10698.5	110.916
HV	2	1	89.6273	8443.58	94.2077
HV	3	1	90.8371	7957.63	87.6033
HV	1	3	64.1836	9054.66	141.075
HV	2	3	105.91	14301.6	135.035
HV	3	3	129.772	10774.6	83.0275
HV	1	5	85.5941	11329.3	132.361
HV	2	5	75.0483	9021.06	120.203
HV	3	5	82.3628	8020.85	97.3843
HV	1	7	120.695	10063.1	83.3762
HV	2	7	95.5632	9876.93	103.355
HV	3	7	149.935	19101.7	127.399
HV	1	9	86.7737	13627.6	157.048
HV	2	9	39.3458	8011.17	203.609
HV	3	9	73.9724	8031.99	108.581
HV	1	11	112.597	15680.1	139.259
HV	2	11	108.893	11785.4	108.229
HV	3	11	106.113	16508.6	155.575
HV	1	13	176.331	25090.3	142.291
HV	2	13	105.028	14753.3	140.47
HV	3	13	91.1576	18002.8	197.49
Control	1	-30	19.3103	3498.19	181.157
Control	2	-30	25.0752	4066.56	162.175
Control	3	-30	37.0184	6537.56	176.603
Control	1	0	53.5713	8904.83	166.224
Control	2	0	29.7087	6001.65	202.016
Control	3	0	110.723	12793.2	115.543
Control	1	1	30.6625	4945.13	161.276
Control	2	1	70.3576	7880.42	112.005
Control	3	1	42.7294	4824.49	112.908
Control	1	3	42.7985	7018.68	163.993
Control	2	3	58.904	8105.01	137.597
Control	3	3	54.0686	7813.42	144.51
Control	1	5	81.4606	11707.9	143.725
Control	2	5	53.7852	8865.78	164.837
Control	3	5	53.8102	8162.94	151.699
Control	1	7	85.6791	15061	175.784
Control	2	7	85.3607	22033.6	258.124
Control	3	7	92.0015	18179.6	197.601
Control	1	9	45.4696	8332.44	183.253
Control	2	9	78.0286	14512.6	185.99
Control	3	9	51.7068	7766.89	150.21
Control	1	11	129.623	19519.5	150.587
Control	2	11	139.238	18264	131.171
Control	3	11	92.2852	17248.4	186.903
Control	1	13	82.6711	12140.1	146.848
Control	2	13	100.157	14902.8	148.794
Control	3	13	95.7462	14433	150.742

## Sheet: LTER
Proj+A:ABect	Transect	Site	Substrate Type	Replicate	Date	Year	Hydro Season	Season	Water Depth (cm)	TP (g/m2)	TN (g/m2)	N:P
FCE	SRS	2	M	1	2003-01-06	2003	Dry	Winter		0.00238086	0.789646	331.665
FCE	SRS	2	M	2	2003-01-06	2003	Dry	Winter		0.0147556	0.838762	56.8438
FCE	SRS	2	M	3	2003-01-06	2003	Dry	Winter		0.0177064	0.876345	49.4932
FCE	SRS	2	M	1	2003-02-27	2003	Dry	Winter		0.00851956	0.854003	100.24
FCE	SRS	2	M	3	2003-02-27	2003	Dry	Winter		0.00532279	0.690645	129.752
FCE	SRS	2	M	3	2003-06-19	2003	Wet	Summer		0.0121651	1.75657	144.394
FCE	SRS	2	M	3	2003-11-07	2003	Dry	Winter		0.00971219	1.09149	112.383
FCE	SRS	2	M	1	2004-02-02	2004	Dry	Winter		0.0131125	1.19699	91.2862
FCE	SRS	2	M	2	2004-02-02	2004	Dry	Winter		0.00685852	0.626089	91.2862
FCE	SRS	2	M	3	2004-02-02	2004	Dry	Winter		0.0111879	1.0213	91.2862
FCE	SRS	2	M	2	2004-09-16	2004	Wet	Fall		0.00313627	0.213219	67.9849
FCE	SRS	2	M	3	2004-09-16	2004	Wet	Fall		0.0035114	0.238722	67.9849
FCE	SRS	2	M	2	2004-11-02	2004	Wet	Fall		0.0113971	0.892613	78.3191
FCE	SRS	2	M	3	2004-11-02	2004	Wet	Fall		0.0142761	1.11809	78.3191
FCE	SRS	2	M	1	2005-03-16	2005	Dry	Spring		0.0120559	1.09398	90.7425
FCE	SRS	2	M	2	2005-03-16	2005	Dry	Spring		0.0154734	1.13792	73.5406
FCE	SRS	2	M	3	2005-03-16	2005	Dry	Spring		0.00868181	0.850064	97.9132
FCE	SRS	2	M	1	2005-07-18	2005	Wet	Summer		0.0033406	0.0966524	28.9327
FCE	SRS	2	M	2	2005-07-18	2005	Wet	Summer		0.0025319	0.0848728	33.5214
FCE	SRS	2	M	3	2005-07-18	2005	Wet	Summer		0.00183958	0.089207	48.4932
FCE	SRS	2	M	2	2005-11-09	2005	Wet	Fall	62	0.00770971	0.792658	102.813
FCE	SRS	2	M	3	2005-11-09	2005	Wet	Fall	65	0.0124109	1.00387	80.8863
FCE	SRS	2	M	1	2006-03-02	2006	Dry	Spring	50	0.00996754	0.707629	70.9934
FCE	SRS	2	M	2	2006-03-02	2006	Dry	Spring	52	0.00812673	0.716056	88.1112
FCE	SRS	2	M	3	2006-03-02	2006	Dry	Spring	48	0.0119874	1.07428	89.6174
FCE	SRS	2	M	1	2006-07-17	2006	Wet	Summer	31	0.00153015	0.086394	56.4611
FCE	SRS	2	M	2	2006-07-17	2006	Wet	Summer	50	0.0014074	0.0778781	55.3349
FCE	SRS	2	M	3	2006-07-17	2006	Wet	Summer	47	0.0028055	0.145744	51.9495
FCE	SRS	2	M	1	2006-10-27	2006	Wet	Fall	52	0.00730726	0.504695	69.0676
FCE	SRS	2	M	2	2006-10-27	2006	Wet	Fall	49	0.0110609	0.609287	55.0848
FCE	SRS	2	M	3	2006-10-27	2006	Wet	Fall	48	0.0173336	1.27098	73.3246
FCE	SRS	2	M	1	2007-03-19	2007	Dry	Spring	8	0.00447566	0.415088	92.7434
FCE	SRS	2	M	2	2007-03-19	2007	Dry	Spring	7	0.00156485	0.194094	124.034
FCE	SRS	2	M	3	2007-03-19	2007	Dry	Spring	8	0.00301439	0.32048	106.317
FCE	SRS	2	M	1	2007-05-24	2007	Wet	Spring	25	0.00330669	0.587237	177.591
FCE	SRS	2	M	2	2007-05-24	2007	Wet	Spring	26	0.0063151	0.486502	77.038
FCE	SRS	2	M	3	2007-05-24	2007	Wet	Spring	27	0.00426903	0.386486	90.5325
FCE	SRS	2	M	1	2007-10-08	2007	Wet	Fall	43	0.0077048	0.639957	83.0596
FCE	SRS	2	M	2	2007-10-08	2007	Wet	Fall	46	0.0101541	0.674119	66.3887
FCE	SRS	2	M	3	2007-10-08	2007	Wet	Fall	48	0.00736428	0.57715	78.3716
FCE	SRS	2	M	1	2008-01-10	2008	Dry	Winter	43	0.011048	0.963786	87.2366
FCE	SRS	2	M	2	2008-01-10	2008	Dry	Winter	42	0.00365613	0.266871	72.9928
FCE	SRS	2	M	3	2008-01-10	2008	Dry	Winter	42	0.00280948	0.58012	206.487
FCE	SRS	2	M	1	2008-10-06	2008	Wet	Fall	63	0.000717755	0.0738492	102.889
FCE	SRS	2	M	2	2008-10-06	2008	Wet	Fall	65	0.00191893	0.189463	98.7339
FCE	SRS	2	M	3	2008-10-06	2008	Wet	Fall	67	0.000744636	0.0687914	92.3826
FCE	SRS	2	M	1	2009-01-05	2009	Dry	Winter	58	0.0112079	0.615887	54.9509
FCE	SRS	2	M	2	2009-01-05	2009	Dry	Winter	62	0.0126395	0.724905	57.3525
FCE	SRS	2	M	3	2009-01-05	2009	Dry	Winter	63	0.00439829	0.244432	55.5743
FCE	SRS	2	M	1	2009-05-12	2009	Wet	Spring	0	0.0650606	3.7469	57.591
FCE	SRS	2	M	2	2009-05-12	2009	Wet	Spring	0	0.0778839	4.88354	62.7028
FCE	SRS	2	M	3	2009-05-12	2009	Wet	Spring	0	0.0661202	4.35625	65.8838
FCE	SRS	2	M	1	2010-01-14	2010	Dry	Winter	42	0.00138372	0.182851	132.145
FCE	SRS	2	M	2	2010-01-14	2010	Dry	Winter	42	0.00129069	0.245727	190.384
FCE	SRS	2	M	3	2010-01-14	2010	Dry	Winter	43	0.00282589	0.258828	91.5919
FCE	SRS	2	M	1	2010-05-05	2010	Wet	Spring	41	0.000783409	0.102414	130.729
FCE	SRS	2	M	2	2010-05-05	2010	Wet	Spring	45	0.00118054	0.0578721	49.0217
FCE	SRS	2	M	3	2010-05-05	2010	Wet	Spring	41	0.00109989	0.105251	95.6928
FCE	SRS	2	M	1	2010-10-04	2010	Wet	Fall	69	0.00366529	0.478501	130.549
FCE	SRS	2	M	2	2010-10-04	2010	Wet	Fall	67	0.00374279	0.34937	93.3447
FCE	SRS	2	M	3	2010-10-04	2010	Wet	Fall	69	0.00373528	0.560547	150.068
FCE	SRS	2	M	1	2011-01-04	2011	Dry	Winter	38	0.00539587	0.568722	105.4
FCE	SRS	2	M	2	2011-01-04	2011	Dry	Winter	38	0.0058854	0.524264	89.0787
FCE	SRS	2	M	3	2011-01-04	2011	Dry	Winter	39	0.00385695	0.380901	98.7571
FCE	SRS	2	M	1	2011-05-12	2011	Wet	Spring	0	0.0331907	2.93535	88.439
FCE	SRS	2	M	2	2011-05-12	2011	Wet	Spring	0	0.0365945	2.8782	78.6512
FCE	SRS	2	M	3	2011-05-12	2011	Wet	Spring	0	0.0631641	4.65102	73.6339
FCE	SRS	2	M	1	2011-10-12	2011	Wet	Fall	45	0.00294907	0.19993	67.7941
FCE	SRS	2	M	2	2011-10-12	2011	Wet	Fall	46	0.00209608	0.190432	90.8514
FCE	SRS	2	M	3	2011-10-12	2011	Wet	Fall	45	0.00235036	0.209345	89.0694
FCE	SRS	2	M	1	2012-01-10	2012	Dry	Winter	45	0.00227389	0.220117	96.802
FCE	SRS	2	M	2	2012-01-10	2012	Dry	Winter	47	0.0026803	0.233348	87.0603
FCE	SRS	2	M	3	2012-01-10	2012	Dry	Winter	43	0.0033246	0.327532	98.5176
FCE	SRS	2	M	1	2012-05-07	2012	Wet	Spring	32	0.000728408	0.0754509	103.583
FCE	SRS	2	M	2	2012-05-07	2012	Wet	Spring	32	0.00118382	0.0929402	78.5088
FCE	SRS	2	M	3	2012-05-07	2012	Wet	Spring	31	0.00114162	0.0994515	87.1143
FCE	SRS	2	M	1	2012-10-10	2012	Wet	Fall	75	0.00454037	0.344548	75.8854
FCE	SRS	2	M	2	2012-10-10	2012	Wet	Fall	75	0.000477055	0.0408583	85.647
FCE	SRS	2	M	3	2012-10-10	2012	Wet	Fall	76	0.00680132	0.452243	66.4935
FCE	SRS	2	M	1	2013-01-08	2013	Dry	Winter	56	0.0170921	0.641469	37.5301
FCE	SRS	2	M	2	2013-01-08	2013	Dry	Winter	56	0.00187685	0.339035	180.64
FCE	SRS	2	M	3	2013-01-08	2013	Dry	Winter	57	0.013624	1.45543	106.828
FCE	SRS	2	M	1	2013-05-08	2013	Wet	Spring	41	0.00731091	0.606166	82.9125
FCE	SRS	2	M	2	2013-05-08	2013	Wet	Spring	41	0.00938506	0.50539	53.8505
FCE	SRS	2	M	3	2013-05-08	2013	Wet	Spring	43	0.00513551	0.452997	88.2088
FCE	SRS	2	M	1	2013-10-24	2013	Wet	Fall	65	0.000567917	0.149237	262.779
FCE	SRS	2	M	2	2013-10-24	2013	Wet	Fall	65	0.00190341	0.153167	80.4702
FCE	SRS	2	M	3	2013-10-24	2013	Wet	Fall	66	0.00128829	0.124081	96.3141
FCE	SRS	2	M	1	2014-01-14	2014	Dry	Winter	50	0.00343208	0.373197	108.738
FCE	SRS	2	M	2	2014-01-14	2014	Dry	Winter	52	0.00463124	0.494022	106.672
FCE	SRS	2	M	3	2014-01-14	2014	Dry	Winter	52	0.00425457	0.455671	107.102
FCE	SRS	2	M	1	2014-05-12	2014	Wet	Spring	39	0.00243551	0.22335	91.7054
FCE	SRS	2	M	2	2014-05-12	2014	Wet	Spring	38	0.00164078	0.196241	119.602
FCE	SRS	2	M	3	2014-05-12	2014	Wet	Spring	39	0.00201899	0.186536	92.391
FCE	SRS	2	M	1	2014-10-10	2014	Wet	Fall	48	0.00156495	0.24007	153.404
FCE	SRS	2	M	2	2014-10-10	2014	Wet	Fall	46	0.00461955	0.313572	67.8794
FCE	SRS	2	M	3	2014-10-10	2014	Wet	Fall	46	0.00351686	0.331096	94.1453
FCE	SRS	2	M	1	2015-01-13	2015	Dry	Winter	48	0.004149	0.304587	73.412
FCE	SRS	2	M	2	2015-01-13	2015	Dry	Winter	46	0.00641751	0.754882	117.629
FCE	SRS	2	M	3	2015-01-13	2015	Dry	Winter	48	0.00548454	0.490265	89.3903
FCE	SRS	2	M	1	2015-04-09	2015	Dry	Spring	39	0.00243963	0.151085	61.9297
FCE	SRS	2	M	2	2015-04-09	2015	Dry	Spring	41	0.0016117	0.183081	113.595
FCE	SRS	2	M	3	2015-04-09	2015	Dry	Spring	42	0.00287614	0.2503	87.0264
FCE	SRS	2	M	1	2015-10-16	2015	Wet	Fall	39	0.00937165	0.817287	87.2085
FCE	SRS	2	M	2	2015-10-16	2015	Wet	Fall	45	0.00870391	0.645715	74.1868
FCE	SRS	2	M	3	2015-10-16	2015	Wet	Fall	46	0.00669843	1.17085	174.795
FCE	SRS	3	M	1	2003-01-06	2003	Dry	Winter		0.0156125	0.651028	41.6991
FCE	SRS	3	M	2	2003-01-06	2003	Dry	Winter		0.00539153	0.363511	67.4227
FCE	SRS	3	M	1	2003-02-27	2003	Dry	Winter		0.0034899	0.228301	65.4175
FCE	SRS	3	M	3	2003-02-27	2003	Dry	Winter		0.00389994	0.249564	63.9916
FCE	SRS	3	M	3	2003-06-19	2003	Wet	Fall		0.0363418	0.404702	11.136
FCE	SRS	3	M	3	2003-10-30	2003	Wet	Fall		0.0110361	0.874296	79.2218
FCE	SRS	3	M	1	2004-02-02	2004	Dry	Winter		0.00291447	0.192078	65.9048
FCE	SRS	3	M	2	2004-02-02	2004	Dry	Winter		0.00209281	0.137926	65.9048
FCE	SRS	3	M	3	2004-02-02	2004	Dry	Winter		0.00470985	0.310401	65.9048
FCE	SRS	3	M	2	2004-09-16	2004	Wet	Fall		0.000869002	0.0564474	64.9566
FCE	SRS	3	M	3	2004-09-16	2004	Wet	Fall		0.000981866	0.0637787	64.9566
FCE	SRS	3	M	2	2004-11-02	2004	Wet	Fall		0.0148263	0.910591	61.4171
FCE	SRS	3	M	3	2004-11-02	2004	Wet	Fall		0.0157431	0.966896	61.4171
FCE	SRS	3	M	2	2005-11-09	2005	Wet	Fall	49	0.0577073	3.23889	56.1263
FCE	SRS	3	M	3	2005-11-09	2005	Wet	Fall	47	0.0286532	1.56965	54.7809
FCE	SRS	3	M	1	2006-03-02	2006	Dry	Spring	39	0.0184914	0.708395	38.3095
FCE	SRS	3	M	2	2006-03-02	2006	Dry	Spring	41	0.021973	1.10243	50.1719
FCE	SRS	3	M	3	2006-03-02	2006	Dry	Spring	35	0.00996146	0.739474	74.2336
FCE	SRS	3	M	1	2006-07-19	2006	Wet	Summer	38	0.00659391	0.2767	41.963
FCE	SRS	3	M	2	2006-07-19	2006	Wet	Summer	31	0.00210984	0.104847	49.6944
FCE	SRS	3	M	3	2006-07-19	2006	Wet	Summer	32	0.00303961	0.159355	52.4261
FCE	SRS	3	M	3	2006-10-27	2006	Wet	Fall	25	0.000268607	0.0156842	58.3909
FCE	SRS	3	M	2	2007-05-24	2007	Wet	Spring	4	0.00347005	0.197579	56.9384
FCE	SRS	3	M	1	2007-10-08	2007	Wet	Fall	38	0.00434225	0.199903	46.0366
FCE	SRS	3	M	2	2007-10-08	2007	Wet	Fall	35	0.00523081	0.223393	42.7072
FCE	SRS	3	M	3	2007-10-08	2007	Wet	Fall	38	0.000893785	0.0800087	89.5167
FCE	SRS	3	M	1	2008-01-10	2008	Dry	Winter	0	0.00171891	0.10515	61.1727
FCE	SRS	3	M	1	2008-10-06	2008	Wet	Fall	50	0.0021863	0.166825	76.3044
FCE	SRS	3	M	2	2008-10-06	2008	Wet	Fall	30	0.00768804	0.480865	62.5471
FCE	SRS	3	M	3	2008-10-06	2008	Wet	Fall	31	0.00342692	0.28993	84.6035
FCE	SRS	3	M	1	2009-01-05	2009	Dry	Winter	30	0.00231622	0.167551	72.3382
FCE	SRS	3	M	2	2009-01-05	2009	Dry	Winter	0	0.00346083	0.216356	62.5157
FCE	SRS	3	M	3	2009-01-05	2009	Dry	Winter	0	0.00289848	0.201777	69.6147
FCE	SRS	3	M	2	2009-05-12	2009	Wet	Spring	50	0.042439	3.09659	72.9655
FCE	SRS	3	M	3	2009-05-12	2009	Wet	Spring	51	0.023864	2.03588	85.3115
FCE	SRS	3	M	1	2009-10-05	2009	Wet	Fall	53	0.00397996	0.303739	76.317
FCE	SRS	3	M	2	2009-10-05	2009	Wet	Fall	24	0.00406905	0.305144	74.9916
FCE	SRS	3	M	3	2009-10-05	2009	Wet	Fall	24	0.00413467	0.333986	80.777
FCE	SRS	3	M	1	2010-01-14	2010	Dry	Winter	24	0.00154271	0.11646	75.4906
FCE	SRS	3	M	2	2010-01-14	2010	Dry	Winter	4	0.00179241	0.12909	72.0204
FCE	SRS	3	M	3	2010-01-14	2010	Dry	Winter	0	0.00223303	0.137967	61.7848
FCE	SRS	3	M	1	2011-01-04	2011	Dry	Winter	56	0.00067192	0.0435296	64.7839
FCE	SRS	3	M	3	2011-01-04	2011	Dry	Winter	29	0.00219208	0.117988	53.8245
FCE	SRS	3	M	1	2012-10-10	2012	Wet	Fall	0	0.000579003	0.0373656	64.5344
FCE	SRS	3	M	2	2012-10-10	2012	Wet	Fall	36	0.00246996	0.167497	67.8135
FCE	SRS	3	M	3	2012-10-10	2012	Wet	Fall	36	0.000824235	0.0826239	100.243
FCE	SRS	3	M	1	2013-01-08	2013	Dry	Winter	35	0.00551165	0.344707	62.5416
FCE	SRS	3	M	2	2013-01-08	2013	Dry	Winter	20	0.00240392	0.271547	112.96
FCE	SRS	3	M	3	2013-01-08	2013	Dry	Winter	23	0.00252872	0.215878	85.3708
FCE	SRS	3	M	1	2013-05-08	2013	Wet	Spring	22	0.00595253	0.461845	77.588
FCE	SRS	3	M	2	2013-05-08	2013	Wet	Spring	0	0.00463016	0.302685	65.3726
FCE	SRS	3	M	3	2013-05-08	2013	Wet	Spring	0	0.00657243	0.422343	64.2598
FCE	SRS	3	M	1	2013-10-24	2013	Wet	Fall	0	0.00141988	0.0992462	69.8976
FCE	SRS	3	M	2	2013-10-24	2013	Wet	Fall	35	0.00173468	0.146917	84.6942
FCE	SRS	3	M	3	2013-10-24	2013	Wet	Fall	38	0.00152817	0.194851	127.506
FCE	SRS	3	M	1	2014-01-14	2014	Dry	Winter	37	0.00202275	0.131962	65.2387
FCE	SRS	3	M	2	2014-01-14	2014	Dry	Winter		0.00354055	0.177646	50.1748
FCE	SRS	3	M	3	2014-01-14	2014	Dry	Winter		0.00323734	0.177913	54.9567
FCE	SRS	3	M	1	2014-05-12	2014	Wet	Spring		0.00187033	0.119012	63.6317
FCE	SRS	3	M	2	2014-05-12	2014	Wet	Spring		0.00106698	0.0815843	76.4632
FCE	SRS	3	M	3	2014-05-12	2014	Wet	Spring		0.000809371	0.0728247	89.9769
FCE	SRS	3	M	1	2014-10-10	2014	Wet	Fall		0.000812408	0.0661919	81.4762
FCE	SRS	3	M	2	2014-10-10	2014	Wet	Fall		0.00082754	0.131294	158.656
FCE	SRS	3	M	3	2014-10-10	2014	Wet	Fall		0.00196131	0.1269	64.7016
FCE	SRS	3	M	1	2015-01-13	2015	Dry	Winter		0.00380162	0.215308	56.636
FCE	SRS	3	M	2	2015-01-13	2015	Dry	Winter	41	0.00867532	0.546957	63.0475
FCE	SRS	3	M	3	2015-01-13	2015	Dry	Winter	43	0.00570943	0.29534	51.7285
FCE	SRS	3	M	1	2015-04-09	2015	Dry	Spring	35	0.000997193	0.110515	110.826
FCE	SRS	3	M	2	2015-04-09	2015	Dry	Spring	33	0.00343836	0.249332	72.5148
FCE	SRS	3	M	3	2015-04-09	2015	Dry	Spring	33	0.00355055	0.283946	79.9724
FCE	SRS	1d	M	3	2003-10-31	2003	Wet	Fall	48	0.00275493	0.150095	54.4824
FCE	SRS	1d	M	1	2005-03-16	2005	Dry	Spring	18	0.0211631	1.39894	66.1027
FCE	SRS	1d	M	2	2005-03-16	2005	Dry	Spring	17	0.0160558	1.53609	95.672
FCE	SRS	1d	M	3	2005-03-16	2005	Dry	Spring	20	0.0237856	1.6946	71.2445
FCE	SRS	1d	M	1	2005-07-18	2005	Wet	Summer	12	0.00630282	0.659708	104.669
FCE	SRS	1d	M	2	2005-07-18	2005	Wet	Summer	13	0.00951736	0.812896	85.412
FCE	SRS	1d	M	3	2005-07-18	2005	Wet	Summer	18	0.00637734	0.597145	93.6354
FCE	SRS	1d	M	2	2005-11-07	2005	Wet	Fall	32	0.000353573	0.0250939	70.9723
FCE	SRS	1d	M	3	2005-11-07	2005	Wet	Fall	32	0.000274507	0.0141123	51.4098
FCE	SRS	1d	M	1	2006-03-02	2006	Dry	Spring	32	0.000637961	0.0396175	62.1001
FCE	SRS	1d	M	3	2006-03-02	2006	Dry	Spring	17	0.000129446	0.00941243	72.7129
FCE	SRS	1d	M	1	2006-10-26	2006	Wet	Fall	5	0.0292191	2.92606	100.142
FCE	SRS	1d	M	2	2006-10-26	2006	Wet	Fall	58	0.000698557	0.0753811	107.91
FCE	SRS	1d	M	3	2006-10-26	2006	Wet	Fall	59	0.00117738	0.127266	108.092
FCE	SRS	1d	M	1	2007-03-19	2007	Dry	Spring	51	0.00294112	0.301094	102.374
FCE	SRS	1d	M	2	2007-03-19	2007	Dry	Spring	32	0.000234991	0.0466325	198.444
FCE	SRS	1d	M	3	2007-03-19	2007	Dry	Spring	35	0.0034042	0.378777	111.267
FCE	SRS	1d	M	1	2007-05-24	2007	Wet	Spring	31	0.0137811	1.89977	137.854
FCE	SRS	1d	M	2	2007-05-24	2007	Wet	Spring	0	0.00769728	0.835464	108.54
FCE	SRS	1d	M	3	2007-05-24	2007	Wet	Spring	0	0.00119849	0.205952	171.844
FCE	SRS	1d	M	1	2007-10-11	2007	Wet	Fall	0	0.0169344	1.98218	117.051
FCE	SRS	1d	M	2	2007-10-11	2007	Wet	Fall	31	0.00725396	0.667866	92.0692
FCE	SRS	1d	M	3	2007-10-11	2007	Wet	Fall	32	0.0228098	1.89486	83.0722
FCE	SRS	1d	M	1	2008-01-10	2008	Dry	Winter	31	0.0104337	1.23163	118.044
FCE	SRS	1d	M	2	2008-01-10	2008	Dry	Winter	31	0.00475243	0.495905	104.348
FCE	SRS	1d	M	3	2008-01-10	2008	Dry	Winter	31	0.00418958	0.548248	130.86
FCE	SRS	1d	M	1	2008-10-06	2008	Wet	Fall	45	0.00198161	0.210157	106.053
FCE	SRS	1d	M	2	2008-10-06	2008	Wet	Fall	42	0.0024923	0.231923	93.0558
FCE	SRS	1d	M	3	2008-10-06	2008	Wet	Fall	44	0.00299389	0.277832	92.7998
FCE	SRS	1d	M	1	2009-01-05	2009	Dry	Winter	47	0.00293478	0.203179	69.2313
FCE	SRS	1d	M	2	2009-01-05	2009	Dry	Winter	28	0.00297907	0.174609	58.6119
FCE	SRS	1d	M	3	2009-01-05	2009	Dry	Winter	29	0.00212517	0.127146	59.8287
FCE	SRS	1d	M	1	2009-05-12	2009	Wet	Spring	27	0.0770007	5.71986	74.2832
FCE	SRS	1d	M	2	2009-05-12	2009	Wet	Spring	0	0.0679305	4.96053	73.0237
FCE	SRS	1d	M	3	2009-05-12	2009	Wet	Spring	0	0.0996883	7.96642	79.9132
FCE	SRS	1d	M	1	2009-10-05	2009	Wet	Fall	0	0.00851564	0.896786	105.31
FCE	SRS	1d	M	2	2009-10-05	2009	Wet	Fall	42	0.00590687	0.511598	86.6106
FCE	SRS	1d	M	3	2009-10-05	2009	Wet	Fall	40	0.00473495	0.402527	85.0119
FCE	SRS	1d	M	1	2010-01-14	2010	Dry	Winter	41	0.00114819	0.233571	203.426
FCE	SRS	1d	M	2	2010-01-14	2010	Dry	Winter	31	0.000642962	0.197327	306.904
FCE	SRS	1d	M	3	2010-01-14	2010	Dry	Winter	30	0.00143811	0.180782	125.708
FCE	SRS	1d	M	1	2010-05-05	2010	Wet	Spring	27	0.00300985	0.194012	64.4592
FCE	SRS	1d	M	2	2010-05-05	2010	Wet	Spring	14	0.00268491	0.205259	76.4492
FCE	SRS	1d	M	3	2010-05-05	2010	Wet	Spring	15	0.00399302	0.211327	52.9239
FCE	SRS	1d	M	1	2010-10-04	2010	Wet	Fall	14	0.00343303	0.515848	150.26
FCE	SRS	1d	M	2	2010-10-04	2010	Wet	Fall	55	0.00571587	0.562156	98.35
FCE	SRS	1d	M	3	2010-10-04	2010	Wet	Fall	57	0.00360766	0.478486	132.63
FCE	SRS	1d	M	1	2011-01-04	2011	Dry	Winter	56	0.0474106	3.20524	67.606
FCE	SRS	1d	M	2	2011-01-04	2011	Dry	Winter	40	0.0161411	2.8623	177.33
FCE	SRS	1d	M	3	2011-01-04	2011	Dry	Winter	43	0.00980405	2.85626	291.335
FCE	SRS	1d	M	1	2011-05-12	2011	Wet	Spring	42	0.0197067	1.42206	72.1612
FCE	SRS	1d	M	2	2011-05-12	2011	Wet	Spring	25	0.0237043	4.02391	169.754
FCE	SRS	1d	M	3	2011-05-12	2011	Wet	Spring	25	0.0329945	8.08267	244.97
FCE	SRS	1d	M	1	2011-10-12	2011	Wet	Fall	27	0.00727417	0.737873	101.437
FCE	SRS	1d	M	2	2011-10-12	2011	Wet	Fall	44	0.00823409	0.66843	81.1784
FCE	SRS	1d	M	3	2011-10-12	2011	Wet	Fall	48	0.00592329	0.495561	83.6632
FCE	SRS	1d	M	1	2012-01-10	2012	Dry	Winter	45	0.00633643	0.585113	92.3411
FCE	SRS	1d	M	2	2012-01-10	2012	Dry	Winter	36	0.00597678	0.51457	86.0948
FCE	SRS	1d	M	3	2012-01-10	2012	Dry	Winter	35	0.00606555	0.702185	115.766
FCE	SRS	1d	M	1	2012-05-07	2012	Wet	Spring	36	0.0339389	1.8294	53.9026
FCE	SRS	1d	M	2	2012-05-07	2012	Wet	Spring	26	0.00871729	0.797568	91.4927
FCE	SRS	1d	M	3	2012-05-07	2012	Wet	Spring	24	0.00699307	0.751043	107.398
FCE	SRS	1d	M	1	2012-10-10	2012	Wet	Fall	26	0.00318872	0.352167	110.442
FCE	SRS	1d	M	2	2012-10-10	2012	Wet	Fall	42	0.00319665	0.563541	176.291
FCE	SRS	1d	M	3	2012-10-10	2012	Wet	Fall	44	0.00491377	0.551986	112.334
FCE	SRS	1d	M	1	2013-01-08	2013	Dry	Winter	46	0.0186977	2.09915	112.268
FCE	SRS	1d	M	2	2013-01-08	2013	Dry	Winter	50	0.0211949	1.934	91.2482
FCE	SRS	1d	M	3	2013-01-08	2013	Dry	Winter	50	0.0276779	4.73827	171.193
FCE	SRS	1d	M	1	2013-05-08	2013	Wet	Spring	50	0.00681754	0.658941	96.6539
FCE	SRS	1d	M	2	2013-05-08	2013	Wet	Spring	0	0.00489773	0.678214	138.475
FCE	SRS	1d	M	3	2013-05-08	2013	Wet	Spring	0	0.00730887	0.786493	107.608
FCE	SRS	1d	M	1	2013-10-24	2013	Wet	Fall	0	0.00237361	0.0814987	34.3353
FCE	SRS	1d	M	2	2013-10-24	2013	Wet	Fall	28	0.00147922	0.102236	69.115
FCE	SRS	1d	M	3	2013-10-24	2013	Wet	Fall	34	0.00301799	0.181926	60.2804
FCE	SRS	1d	M	1	2014-01-14	2014	Dry	Winter	29	0.00213497	0.228499	107.026
FCE	SRS	1d	M	2	2014-01-14	2014	Dry	Winter	36	0.00249383	0.243031	97.4528
FCE	SRS	1d	M	3	2014-01-14	2014	Dry	Winter	39	0.00461799	0.290463	62.8981
FCE	SRS	1d	M	1	2014-05-12	2014	Wet	Spring	39	0.00239018	0.230338	96.3683
FCE	SRS	1d	M	2	2014-05-12	2014	Wet	Spring	0	0.00414832	0.320399	77.2357
FCE	SRS	1d	M	3	2014-05-12	2014	Wet	Spring	0	0.00274026	0.234574	85.6025
FCE	SRS	1d	M	1	2014-10-10	2014	Wet	Fall	0	0.0152749	0.643982	42.1596
FCE	SRS	1d	M	2	2014-10-10	2014	Wet	Fall	0	0.0172933	0.981506	56.7565
FCE	SRS	1d	M	3	2014-10-10	2014	Wet	Fall	0	0.0151933	1.10016	72.4107
FCE	SRS	1d	M	1	2015-01-13	2015	Dry	Winter	0	0.00899631	0.640112	71.1528
FCE	SRS	1d	M	2	2015-01-13	2015	Dry	Winter	65	0.0192349	1.42769	74.2238
FCE	SRS	1d	M	3	2015-01-13	2015	Dry	Winter	65	0.0141772	1.21135	85.4437
FCE	SRS	1d	M	1	2015-04-09	2015	Wet	Spring	67	0.0495998	5.38785	108.626
FCE	SRS	1d	M	2	2015-04-09	2015	Wet	Spring	30	0.0128849	0.974129	75.6022
FCE	SRS	1d	M	3	2015-04-09	2015	Wet	Spring	22	0.0210192	2.3033	109.581
FCE	SRS	1d	M	1	2015-10-16	2015	Wet	Fall	20	0.0150535	1.56795	104.159
FCE	SRS	1d	M	2	2015-10-16	2015	Wet	Fall	0	0.0314436	3.90605	124.224
FCE	SRS	1d	M	3	2015-10-16	2015	Wet	Fall	0	0.0115318	1.20966	104.898
FCE	TSPh	2	M	1	2007-10-10	2007	Wet	Fall	0	0.00945478	1.84959	195.625
FCE	TSPh	2	M	2	2007-10-10	2007	Wet	Fall	85	0.00702995	2.01728	286.955
FCE	TSPh	2	M	3	2007-10-10	2007	Wet	Fall	87	0.0126529	2.03412	160.763
FCE	TSPh	2	M	1	2008-01-08	2008	Dry	Winter	85	0.0839107	12.4441	148.301
FCE	TSPh	2	M	2	2008-01-08	2008	Dry	Winter	17	0.00877037	4.0648	463.47
FCE	TSPh	2	M	3	2008-01-08	2008	Dry	Winter	18	0.0435288	6.75197	155.115
FCE	TSPh	2	M	1	2008-05-22	2008	Wet	Spring	18	0.0758379	1.50986	19.909
FCE	TSPh	2	M	2	2008-05-22	2008	Wet	Spring	0	0.0169	1.13122	66.9363
FCE	TSPh	2	M	3	2008-05-22	2008	Wet	Spring	5	0.0108561	0.91321	84.1198
FCE	TSPh	2	M	1	2008-10-08	2008	Wet	Fall	0	0.0168188	1.28747	76.5493
FCE	TSPh	2	M	2	2008-10-08	2008	Wet	Fall	45	0.0173486	1.17129	67.5146
FCE	TSPh	2	M	3	2008-10-08	2008	Wet	Fall	45	0.024316	2.01166	82.7301
FCE	TSPh	2	M	1	2009-01-14	2009	Dry	Winter	47	0.00419138	0.458818	109.467
FCE	TSPh	2	M	2	2009-01-14	2009	Dry	Winter	3	0.00749399	0.637555	85.0755
FCE	TSPh	2	M	3	2009-01-14	2009	Dry	Winter	5	0.00290829	0.314937	108.289
FCE	TSPh	2	M	1	2009-05-13	2009	Wet	Spring	4	0.0110231	1.6442	149.159
FCE	TSPh	2	M	2	2009-05-13	2009	Wet	Spring	0	0.00701325	1.23988	176.791
FCE	TSPh	2	M	3	2009-05-13	2009	Wet	Spring	0	0.0283652	5.98411	210.967
FCE	TSPh	2	M	1	2009-10-06	2009	Wet	Fall	0	0.00283887	0.496806	175.001
FCE	TSPh	2	M	2	2009-10-06	2009	Wet	Fall	28	0.00483721	0.497148	102.776
FCE	TSPh	2	M	3	2009-10-06	2009	Wet	Fall	27	0.00303875	0.406768	133.86
FCE	TSPh	2	M	1	2010-01-06	2010	Dry	Winter	23	0.00271487	0.266771	98.2628
FCE	TSPh	2	M	2	2010-01-06	2010	Dry	Winter	16	0.00181247	0.23778	131.191
FCE	TSPh	2	M	3	2010-01-06	2010	Dry	Winter	9	0.00203104	0.3267	160.854
FCE	TSPh	2	M	1	2010-05-25	2010	Wet	Spring	9	0.00699289	0.426246	60.9542
FCE	TSPh	2	M	2	2010-05-25	2010	Wet	Spring	27	0.0169921	0.628736	37.0017
FCE	TSPh	2	M	3	2010-05-25	2010	Wet	Spring	27	0.00732421	0.465752	63.5907
FCE	TSPh	2	M	1	2010-10-12	2010	Wet	Fall	28	0.00697556	1.20997	173.458
FCE	TSPh	2	M	2	2010-10-12	2010	Wet	Fall	61	0.00527905	0.73374	138.991
FCE	TSPh	2	M	3	2010-10-12	2010	Wet	Fall	63	0.00448883	1.41524	315.281
FCE	TSPh	2	M	1	2011-01-26	2011	Dry	Winter	60	0.011538	0.755117	65.446
FCE	TSPh	2	M	2	2011-01-26	2011	Dry	Winter	14	0.00157352	0.746186	474.214
FCE	TSPh	2	M	3	2011-01-26	2011	Dry	Winter	14	0.00284336	1.30829	460.121
FCE	TSPh	2	M	1	2011-05-18	2011	Wet	Spring	11	0.123078	12.5033	101.588
FCE	TSPh	2	M	2	2011-05-18	2011	Wet	Spring	2	0.0611817	6.08012	99.3781
FCE	TSPh	2	M	3	2011-05-18	2011	Wet	Spring	7	0.0681989	7.73235	113.379
FCE	TSPh	2	M	1	2011-10-11	2011	Wet	Fall	1	0.00281953	0.257177	91.2129
FCE	TSPh	2	M	2	2011-10-11	2011	Wet	Fall	56	0.00257336	0.337489	131.147
FCE	TSPh	2	M	3	2011-10-11	2011	Wet	Fall	55	0.00379239	0.406808	107.27
FCE	TSPh	2	M	1	2012-01-04	2012	Dry	Winter	55	0.0102155	0.972028	95.1527
FCE	TSPh	2	M	2	2012-01-04	2012	Dry	Winter	19	0.0216051	1.69849	78.6152
FCE	TSPh	2	M	3	2012-01-04	2012	Dry	Winter	30	0.0159763	1.53763	96.2442
FCE	TSPh	2	M	1	2012-05-09	2012	Wet	Spring	26	0.00695113	0.474101	68.2049
FCE	TSPh	2	M	2	2012-05-09	2012	Wet	Spring	0	0.00244187	0.235054	96.2599
FCE	TSPh	2	M	3	2012-05-09	2012	Wet	Spring	0	0.0022177	0.171909	77.5168
FCE	TSPh	2	M	1	2012-10-09	2012	Wet	Fall	0	0.0284211	2.87887	101.293
FCE	TSPh	2	M	2	2012-10-09	2012	Wet	Fall	50	0.0421164	4.31897	102.548
FCE	TSPh	2	M	3	2012-10-09	2012	Wet	Fall	53	0.0384641	2.97831	77.4309
FCE	TSPh	2	M	1	2013-01-15	2013	Dry	Winter	51	0.0415204	3.6167	87.1066
FCE	TSPh	2	M	2	2013-01-15	2013	Dry	Winter	28	0.0696138
FCE	TSPh	2	M	3	2013-01-15	2013	Dry	Winter	32	0.0833954	3.34574	40.119
FCE	TSPh	2	M	1	2013-05-16	2013	Wet	Spring	29	0.0610485	4.58423	75.0915
FCE	TSPh	2	M	2	2013-05-16	2013	Wet	Spring	0	0.0627999	7.41598	118.089
FCE	TSPh	2	M	3	2013-05-16	2013	Wet	Spring	0	0.13831	10.4781	75.7584
FCE	TSPh	2	M	1	2013-10-29	2013	Wet	Fall	0	0.0372762	3.53679	94.8806
FCE	TSPh	2	M	2	2013-10-29	2013	Wet	Fall	27	0.496207	2.95818	5.96159
FCE	TSPh	2	M	3	2013-10-29	2013	Wet	Fall	29	0.0823226	2.96281	35.9902
FCE	TSPh	2	M	1	2014-01-21	2014	Dry	Winter	34	0.0782578	6.07416	77.6172
FCE	TSPh	2	M	2	2014-01-21	2014	Dry	Winter	37	0.0257575	3.30188	128.191
FCE	TSPh	2	M	3	2014-01-21	2014	Dry	Winter	30	0.014239	1.88221	132.188
FCE	TSPh	2	M	1	2014-05-12	2014	Wet	Spring	40	0.0702401	3.50277	49.8686
FCE	TSPh	2	M	2	2014-05-12	2014	Wet	Spring	15.5	0.125131	6.14764	49.1298
FCE	TSPh	2	M	3	2014-05-12	2014	Wet	Spring	16	0.0570425	3.97145	69.6226
FCE	TSPh	2	M	1	2014-10-15	2014	Wet	Fall	16	0.035823	3.49572	97.583
FCE	TSPh	2	M	2	2014-10-15	2014	Wet	Fall	0	0.0228314	4.07762	178.597
FCE	TSPh	2	M	3	2014-10-15	2014	Wet	Fall	0	0.0310234	3.78721	122.076
FCE	TSPh	2	M	1	2015-01-14	2015	Dry	Winter	0	0.00452727	0.284761	62.899
FCE	TSPh	2	M	2	2015-01-14	2015	Dry	Winter	34	0.00810058	5.52515e-05	0.00682068
FCE	TSPh	2	M	3	2015-01-14	2015	Dry	Winter	34	0.00534432	0.288976	54.0716
FCE	TSPh	2	M	1	2015-05-11	2015	Wet	Spring	32	0.014917	1.19042	79.8028
FCE	TSPh	2	M	2	2015-05-11	2015	Wet	Spring	19	0.0122778	0.946001	77.05
FCE	TSPh	2	M	3	2015-05-11	2015	Wet	Spring	21	0.0194275	1.10317	56.7841
FCE	TSPh	2	M	1	2015-10-13	2015	Wet	Fall	23	0.0319938	2.7382	85.5854
FCE	TSPh	2	M	2	2015-10-13	2015	Wet	Fall	0	0.0284088	2.7283	96.0371
FCE	TSPh	2	M	3	2015-10-13	2015	Wet	Fall	0	0.0434581	5.30632	122.102
FCE	TSPh	3	M	1	2007-10-09	2007	Wet	Fall	0	0.0117517	2.35422	200.33
FCE	TSPh	3	M	2	2007-10-09	2007	Wet	Fall	53	0.0280047	5.13564	183.385
FCE	TSPh	3	M	3	2007-10-09	2007	Wet	Fall	55	0.00524565	2.52874	482.063
FCE	TSPh	3	M	1	2008-01-09	2008	Dry	Winter	55	0.00745208	2.15588	289.3
FCE	TSPh	3	M	2	2008-01-09	2008	Dry	Winter	23	0.111671	2.7835	24.926
FCE	TSPh	3	M	3	2008-01-09	2008	Dry	Winter	23	0.00965318	3.26722	338.461
FCE	TSPh	3	M	1	2008-05-20	2008	Wet	Spring	23	0.0322245	3.85984	119.78
FCE	TSPh	3	M	2	2008-05-20	2008	Wet	Spring	8	0.0309757	5.44755	175.865
FCE	TSPh	3	M	3	2008-05-20	2008	Wet	Spring	12	0.0195442	7.82341	400.293
FCE	TSPh	3	M	1	2008-10-07	2008	Wet	Fall	10	0.0363943	6.07307	166.869
FCE	TSPh	3	M	2	2008-10-07	2008	Wet	Fall	42	0.0361545	7.52102	208.024
FCE	TSPh	3	M	3	2008-10-07	2008	Wet	Fall	44	0.0350547	5.22946	149.18
FCE	TSPh	3	M	1	2009-01-14	2009	Dry	Winter	45	0.132887	15.5168	116.766
FCE	TSPh	3	M	2	2009-01-14	2009	Dry	Winter	23	0.1104	13.9502	126.361
FCE	TSPh	3	M	3	2009-01-14	2009	Dry	Winter	26	0.0989649	14.5171	146.689
FCE	TSPh	3	M	1	2009-05-12	2009	Wet	Spring	22	0.0139364	2.27943	163.559
FCE	TSPh	3	M	2	2009-05-12	2009	Wet	Spring	0	0.021615	4.63107	214.252
FCE	TSPh	3	M	3	2009-05-12	2009	Wet	Spring	0	0.0155966	3.88461	249.068
FCE	TSPh	3	M	1	2009-10-07	2009	Wet	Fall	0	0.00166193	0.45877	276.045
FCE	TSPh	3	M	2	2009-10-07	2009	Wet	Fall	30	0.00278675	0.79748	286.168
FCE	TSPh	3	M	3	2009-10-07	2009	Wet	Fall	32	0.00183913	0.500135	271.94
FCE	TSPh	3	M	1	2010-01-21	2010	Dry	Winter	35	0.00120596	2.08838	1731.71
FCE	TSPh	3	M	2	2010-01-21	2010	Dry	Winter	14	0.0112451	1.41382	125.727
FCE	TSPh	3	M	3	2010-01-21	2010	Dry	Winter	13	0.0128655	2.47679	192.514
FCE	TSPh	3	M	1	2010-05-06	2010	Wet	Spring	17	0.00619005	0.85182	137.611
FCE	TSPh	3	M	2	2010-05-06	2010	Wet	Spring	14	0.00102661	0.532911	519.096
FCE	TSPh	3	M	3	2010-05-06	2010	Wet	Spring	14	0.00613188	0.941541	153.549
FCE	TSPh	3	M	2	2010-10-06	2010	Wet	Fall	35	0.00553665	0.438284	79.1604
FCE	TSPh	3	M	3	2010-10-06	2010	Wet	Fall	37	0.000276143	0.187321	678.345
FCE	TSPh	3	M	1	2011-01-20	2011	Dry	Winter	39	0.00272882	0.688826	252.426
FCE	TSPh	3	M	2	2011-01-20	2011	Dry	Winter	25	0.00564409	0.604462	107.097
FCE	TSPh	3	M	3	2011-01-20	2011	Dry	Winter	20	0.00198306	0.381995	192.629
FCE	TSPh	3	M	1	2011-05-12	2011	Wet	Spring	23	0.0141531	2.23333	157.798
FCE	TSPh	3	M	2	2011-05-12	2011	Wet	Spring	15	0.00966035	2.04846	212.048
FCE	TSPh	3	M	3	2011-05-12	2011	Wet	Spring	18	0.0139329	3.17027	227.539
FCE	TSPh	3	M	1	2011-10-13	2011	Wet	Fall	16	0.00161548	0.403287	249.64
FCE	TSPh	3	M	2	2011-10-13	2011	Wet	Fall	22	0.002007	0.291219	145.102
FCE	TSPh	3	M	3	2011-10-13	2011	Wet	Fall	23	0.00261058	0.303683	116.328
FCE	TSPh	3	M	1	2012-01-05	2012	Dry	Winter	22	0.0270087	2.65123	98.1619
FCE	TSPh	3	M	2	2012-01-05	2012	Dry	Winter	24	0.00475057	2.15754	454.164
FCE	TSPh	3	M	3	2012-01-05	2012	Dry	Winter	31	0.00832914	3.07706	369.434
FCE	TSPh	3	M	1	2012-05-07	2012	Wet	Spring	27	0.0178806	2.12111	118.627
FCE	TSPh	3	M	2	2012-05-07	2012	Wet	Spring	0	0.0102033	0.967635	94.8356
FCE	TSPh	3	M	3	2012-05-07	2012	Wet	Spring	0	0.00892046	0.936768	105.013
FCE	TSPh	3	M	1	2012-10-11	2012	Wet	Fall	0	0.016249	1.83603	112.994
FCE	TSPh	3	M	2	2012-10-11	2012	Wet	Fall	18	0.02012	1.82161	90.5377
FCE	TSPh	3	M	3	2012-10-11	2012	Wet	Fall	18	0.0122572	1.54697	126.209
FCE	TSPh	3	M	1	2013-01-08	2013	Dry	Winter	17	0.02386	6.18715	259.31
FCE	TSPh	3	M	2	2013-01-08	2013	Dry	Winter	24	0.0265834	9.65079	363.038
FCE	TSPh	3	M	3	2013-01-08	2013	Dry	Winter	27	0.0223906	8.05664	359.823
FCE	TSPh	3	M	1	2013-05-03	2013	Wet	Spring	23	0.0412328	4.84121	117.412
FCE	TSPh	3	M	2	2013-05-03	2013	Wet	Spring	17	0.0685382	3.22015	46.9833
FCE	TSPh	3	M	3	2013-05-03	2013	Wet	Spring	16	0.0203409	3.19969	157.303
FCE	TSPh	3	M	1	2013-10-31	2013	Wet	Fall	19	0.0513133	12.374	241.147
FCE	TSPh	3	M	2	2013-10-31	2013	Wet	Fall	31	0.0235514	4.99784	212.21
FCE	TSPh	3	M	3	2013-10-31	2013	Wet	Fall	28	0.0457797	8.03061	175.419
FCE	TSPh	3	M	1	2014-01-09	2014	Dry	Winter	31	0.0736733	12.6317	171.456
FCE	TSPh	3	M	2	2014-01-09	2014	Dry	Winter	0	0.0396126	6.6382	167.578
FCE	TSPh	3	M	3	2014-01-09	2014	Dry	Winter	0	0.103426	14.4842	140.044
FCE	TSPh	3	M	1	2014-05-22	2014	Wet	Spring	0	0.0182657	4.65554	254.879
FCE	TSPh	3	M	2	2014-05-22	2014	Wet	Spring	0	0.0191879	7.00133	364.882
FCE	TSPh	3	M	3	2014-05-22	2014	Wet	Spring	0	0.0226789	7.61807	335.91
FCE	TSPh	3	M	1	2014-10-16	2014	Wet	Fall	0	0.0188241	3.37455	179.267
FCE	TSPh	3	M	2	2014-10-16	2014	Wet	Fall	33	0.022005	4.77975	217.212
FCE	TSPh	3	M	3	2014-10-16	2014	Wet	Fall	36	0.0271034	4.36121	160.91
FCE	TSPh	3	M	1	2015-01-13	2015	Dry	Winter	34	0.021355	3.42076	160.186
FCE	TSPh	3	M	2	2015-01-13	2015	Dry	Winter	0	0.0216025	3.75742	173.934
FCE	TSPh	3	M	3	2015-01-13	2015	Dry	Winter	0	0.0407796	5.43482	133.273
FCE	TSPh	3	M	1	2015-05-16	2015	Wet	Spring	0	0.0690989	9.74452	141.023
FCE	TSPh	3	M	2	2015-05-16	2015	Wet	Spring	0	0.071941	11.221	155.975
FCE	TSPh	3	M	3	2015-05-16	2015	Wet	Spring	0	0.0537055	11.044	205.641
FCE	TSPh	3	M	1	2015-10-20	2015	Wet	Fall	0	0.0214008	3.22715	150.796
FCE	TSPh	3	M	2	2015-10-20	2015	Wet	Fall	46	0.0335894	3.8916	115.858
FCE	TSPh	3	M	3	2015-10-20	2015	Wet	Fall	45	0.0270468	3.70698	137.058
FCE	TSPh	1b	M	1	2008-01-08	2008	Dry	Winter	45	0.100036	9.86706	98.635
FCE	TSPh	1b	M	2	2008-01-08	2008	Dry	Winter	0	0.00947122	0.6481	68.4283
FCE	TSPh	1b	M	3	2008-01-08	2008	Dry	Winter	0	0.083206	8.63435	103.771
FCE	TSPh	1b	M	1	2008-05-22	2008	Wet	Spring	0	0.0186317	1.7219	92.4177
FCE	TSPh	1b	M	2	2008-05-22	2008	Wet	Spring	16	0.0116015	0.840139	72.4161
FCE	TSPh	1b	M	3	2008-05-22	2008	Wet	Spring	16	0.0290783	1.83736	63.1868
FCE	TSPh	1b	M	1	2008-10-08	2008	Wet	Fall	15	0.0238124	0.573982	24.1043
FCE	TSPh	1b	M	2	2008-10-08	2008	Wet	Fall	0	0.0084585	0.527868	62.4068
FCE	TSPh	1b	M	3	2008-10-08	2008	Wet	Fall	0	0.00172925	0.109221	63.161
FCE	TSPh	1b	M	1	2009-01-14	2009	Dry	Winter	0	0.0292269	1.54728	52.9404
FCE	TSPh	1b	M	2	2009-01-14	2009	Dry	Winter	0	0.029419	1.57622	53.5783
FCE	TSPh	1b	M	3	2009-01-14	2009	Dry	Winter	0	0.0178501	0.643251	36.0363
FCE	TSPh	1b	M	1	2009-05-13	2009	Wet	Spring	0	0.0170522	1.12305	65.8598
FCE	TSPh	1b	M	2	2009-05-13	2009	Wet	Spring	10	0.0132697	0.926628	69.8302
FCE	TSPh	1b	M	3	2009-05-13	2009	Wet	Spring	10	0.00946765	0.510043	53.8722
FCE	TSPh	1b	M	1	2009-10-06	2009	Wet	Fall	10	0.00507989	0.39642	78.0371
FCE	TSPh	1b	M	2	2009-10-06	2009	Wet	Fall	0	0.00700636	0.436776	62.3399
FCE	TSPh	1b	M	3	2009-10-06	2009	Wet	Fall	0	0.00519207	0.322618	62.1366
FCE	TSPh	1b	M	1	2010-01-06	2010	Dry	Winter	0	0.00631625	0.360407	57.0602
FCE	TSPh	1b	M	2	2010-01-06	2010	Dry	Winter	2	0.00417902	0.222654	53.279
FCE	TSPh	1b	M	3	2010-01-06	2010	Dry	Winter	0	0.00288452	0.215501	74.7093
FCE	TSPh	1b	M	1	2010-10-12	2010	Wet	Fall	52	0.0098152	1.37896	140.493
FCE	TSPh	1b	M	2	2010-10-12	2010	Wet	Fall	0	0.0129039	1.30338	101.007
FCE	TSPh	1b	M	3	2010-10-12	2010	Wet	Fall	0	0.00520945	1.07246	205.869
FCE	TSPh	1b	M	1	2011-01-26	2011	Dry	Winter	0	0.0469386	4.62539	98.5411
FCE	TSPh	1b	M	2	2011-01-26	2011	Dry	Winter	0	0.0249948	1.88473	75.4048
FCE	TSPh	1b	M	3	2011-01-26	2011	Dry	Winter	0	0.0296878	3.43406	115.672
FCE	TSPh	1b	M	1	2011-05-18	2011	Wet	Spring	0	0.0388462	3.33204	85.7751
FCE	TSPh	1b	M	2	2011-05-18	2011	Wet	Spring	18	0.0570448	3.77425	66.1629
FCE	TSPh	1b	M	3	2011-05-18	2011	Wet	Spring	20	0.0617302	5.59441	90.6267
FCE	TSPh	1b	M	1	2011-10-11	2011	Wet	Fall	19	0.00664389	0.444846	66.9556
FCE	TSPh	1b	M	2	2011-10-11	2011	Wet	Fall	8	0.00251877	0.217707	86.4335
FCE	TSPh	1b	M	3	2011-10-11	2011	Wet	Fall	10	0.00142031	0.306293	215.652
FCE	TSPh	1b	M	1	2012-01-04	2012	Dry	Winter	12	0.0109118	1.43961	131.932
FCE	TSPh	1b	M	2	2012-01-04	2012	Dry	Winter	0	0.0131228	1.06978	81.521
FCE	TSPh	1b	M	3	2012-01-04	2012	Dry	Winter	0	0.0186599	2.07456	111.177
FCE	TSPh	1b	M	1	2012-05-09	2012	Wet	Spring	0	0.00296081	0.208379	70.3789
FCE	TSPh	1b	M	2	2012-05-09	2012	Wet	Spring	20	0.0011227	0.0833417	74.2333
FCE	TSPh	1b	M	3	2012-05-09	2012	Wet	Spring	24	0.00108656	0.0947297	87.1833
FCE	TSPh	1b	M	1	2012-10-09	2012	Wet	Fall	23	0.0367063	3.7379	101.833
FCE	TSPh	1b	M	2	2012-10-09	2012	Wet	Fall	23	0.0229283	2.63578	114.957
FCE	TSPh	1b	M	3	2012-10-09	2012	Wet	Fall	23	0.021876	2.69993	123.42
FCE	TSPh	1b	M	1	2013-01-15	2013	Dry	Winter	25	0.0108749	1.22805	112.926
FCE	TSPh	1b	M	2	2013-01-15	2013	Dry	Winter	0	0.00702403	0.909918	129.544
FCE	TSPh	1b	M	3	2013-01-15	2013	Dry	Winter	0	0.00981958	1.15834	117.963
FCE	TSPh	1b	M	1	2013-05-16	2013	Wet	Spring	0	0.343169	13.2071	38.4857
FCE	TSPh	1b	M	2	2013-05-16	2013	Wet	Spring	4	0.15018	13.9754	93.0571
FCE	TSPh	1b	M	3	2013-05-16	2013	Wet	Spring	8	0.209259	40.0654	191.463
FCE	TSPh	1b	M	1	2013-10-29	2013	Wet	Fall	5	0.0371769	3.56593	95.9179
FCE	TSPh	1b	M	2	2013-10-29	2013	Wet	Fall	0.95	2.92183	122.643	41.9747
FCE	TSPh	1b	M	3	2013-10-29	2013	Wet	Fall	0.99	2.49058	126.275	50.7009
FCE	TSPh	1b	M	1	2014-01-07	2014	Dry	Winter	0.9	6.21509	108.848	17.5136
FCE	TSPh	1b	M	2	2014-01-07	2014	Dry	Winter	0.75	4.64627	72.0163	15.4998
FCE	TSPh	1b	M	3	2014-01-07	2014	Dry	Winter	0.98	5.83226	103.709	17.7819
FCE	TSPh	1b	M	1	2014-05-12	2014	Wet	Spring	0.85	5.1657	67.8494	13.1346
FCE	TSPh	1b	M	2	2014-05-12	2014	Wet	Spring	0.85	6.45597	69.3157	10.7367
FCE	TSPh	1b	M	3	2014-05-12	2014	Wet	Spring	0.85	4.21475	73.7011	17.4865
FCE	TSPh	1b	M	1	2014-10-15	2014	Wet	Fall	0.85	2.60706	61.8445	23.722
FCE	TSPh	1b	M	2	2014-10-15	2014	Wet	Fall	0.9	3.82836	78.2072	20.4284
FCE	TSPh	1b	M	3	2014-10-15	2014	Wet	Fall	0.85	3.83007	72.9795	19.0544
FCE	TSPh	1b	M	1	2015-01-14	2015	Dry	Winter	0.5	0.610921	73.2933	119.972
FCE	TSPh	1b	M	2	2015-01-14	2015	Dry	Winter	0.5	0.449659	63.669	141.594
FCE	TSPh	1b	M	3	2015-01-14	2015	Dry	Winter	0.5	0.999486	81.6309	81.6729
FCE	TSPh	1b	M	1	2015-05-11	2015	Wet	Spring	0.6	3.79268	81.812	21.571
FCE	TSPh	1b	M	2	2015-05-11	2015	Wet	Spring	0.6	2.96018	89.1957	30.1319
FCE	TSPh	1b	M	3	2015-05-11	2015	Wet	Spring	0.6	1.76874	75.439	42.6512
FCE	TSPh	1b	M	1	2015-10-13	2015	Wet	Fall	0.75	2.59159	70.5711	27.2308
FCE	TSPh	1b	M	2	2015-10-13	2015	Wet	Fall	0.75	3.49701	72.3885	20.7001
FCE	TSPh	1b	M	3	2015-10-13	2015	Wet	Fall	0.75	3.46271	81.6681	23.585
